# Supplementary material for: PET-RAFT single unit monomer insertion of β-methylstyrene derivatives: RAFT degradation and reaction selectivity
Source: Royal Society of Chemistry journal article supplement (doi:10.1039/d1cc03927j), 2021-01-01
Supplement: d1cc03927j1.pdf [file d1cc03927j1.pdf]

# PET-RAFT single unit monomer insertion of $\beta$ -methylstyrene derivatives: RAFT degradation and reaction selectivity

Lei Zhang, Ruizhe Liu, Shiyang Lin, Jiangtao Xu\*

School of Chemical Engineering, UNSW Sydney, NSW 2052, Australia

## 1. Materials and instrumentation

### 1.1. Materials

*N*-phenylmaleimide (PMI, 97%), *trans*-anethole (Ane, 99%) and 5,10,15,20-tetraphenyl-21*H*,23*H*-porphine zinc (ZnTPP, 98%) were purchased from Sigma-Aldrich and used as received. Acrylonitrile (ACN, 99%) and *trans*- $\beta$ -methyl styrene (MeSt) were purchased from Sigma-Aldrich and purified with a column of basic alumina before use. (2-Cyanopropan-2-yl) butyl trithiocarbonate (CPBTC) and *n*-butyl benzyl trithiocarbonate (BBTC) were synthesized according to previous procedures.<sup>1-2</sup> Dimethyl sulfoxide (DMSO), DMSO-*d*<sub>6</sub>, chloroform, chloroform-*d*, *n*-hexane, ethyl acetate, were purchased from Ajax Chemical and used as received.

### 1.2. Instrumentation

**Nuclear magnetic resonance (NMR)** spectroscopy was carried out on a Bruker Advance III (400 MHz) with SampleXpress operating at 400 MHz for <sup>1</sup>H, <sup>13</sup>C, <sup>1</sup>H-<sup>13</sup>C HMBC and <sup>1</sup>H-<sup>13</sup>C HSQC using CDCl<sub>3</sub> or DMSO-*d*<sub>6</sub> as solvent and tetramethylsilane (TMS) as a reference. The data obtained was reported as chemical shift ( $\delta$ ) measured in ppm downfield from TMS.

Biotage® (Isolera One) **automated flash chromatography** with SNAP Ultra cartridges and ZIP Sphere cartridges was used for the purification and separation of desired SUMI products.

**Photo reactors** were irradiated by LED RGB strip light rearranged in a glass bath with a diameter of 12 cm (red light:  $\lambda_{\text{max}} = 635 \text{ nm}$ ,  $0.23 \text{ mW cm}^{-2}$ ) as shown below.

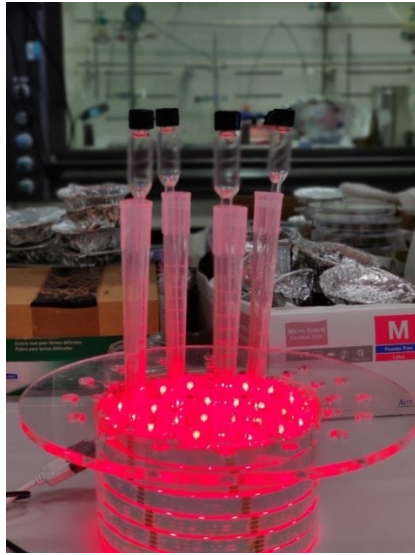

## 2. Synthesis of RAFT agents

**Synthesis of CPBTC-PMI:** CPBTC (260 mg, 1.11 mmol), PMI (231 mg, 1.33 mmol) and ZnTPP (6 mg, 0.009 mol) was dissolved in 10 mL DMSO in a 21 mL glass vial. The vial was sealed with a rubber septum and the reaction solution was degassed with nitrogen for 20 min. Then the reaction mixture was irradiated under red LED light ( $0.23 \text{ mW cm}^{-2}$ ) at room temperature. After 30 h, 30 mL  $\text{CHCl}_3$  was added to the reaction solution and 30 mL deionized water was also added to extract DMSO from  $\text{CHCl}_3$ . The extraction step was repeated three times and the organic phase was collected. The solvent  $\text{CHCl}_3$  was removed, and the crude mixture was purified by column chromatography using *n*-hexane/ethyl acetate (50/1 to 10/1, v/v) as gradient eluent. The final product was yellow oil (yield: 90%).

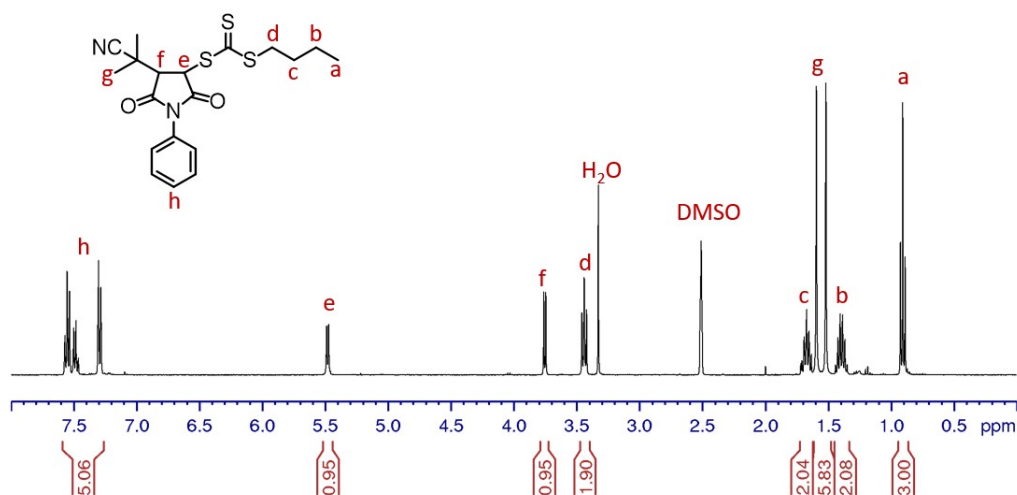

**Fig. S1**  $^1\text{H}$  NMR (400 MHz,  $\text{DMSO}-d_6$ ) spectrum of purified CPBTC-PMI.

The synthetic procedure of BBTC-PMI and CPBTC-ACN refers to our previous report.<sup>3</sup>

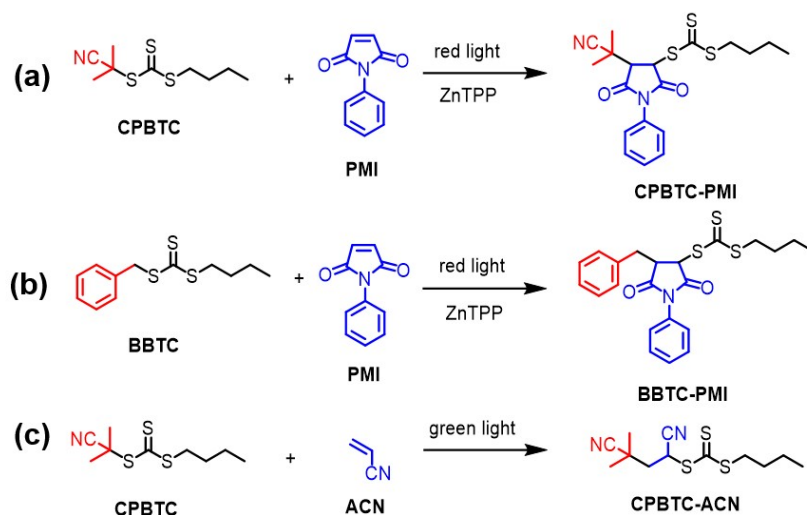

**Scheme S1.** Synthetic routes of CPBTC-PMI, BBTC-PMI, and CPBTC-ACN.

### 3. Kinetic investigation of MeSt and Ane into different RAFT agents

#### 3.1. Kinetic experiment

The kinetic experiment was carried out in DMSO- $d_6$  by monitoring RAFT agent consumption using online  $^1\text{H}$  NMR spectroscopy. Different RAFT agents,  $\beta$ -methylstyrene derivatives (MeSt or Ane), ZnTPP was dissolved in 600  $\mu\text{L}$  DMSO- $d_6$  with the molar ratio of [RAFT]:[MeSt or Ane]:[ZnTPP] = 1:10:0.01 and [RAFT] = 0.05 mol L $^{-1}$ . Then the solution was transferred into a screw-cap NMR tube, which was sealed and degassed by nitrogen for 10 min. The reaction mixture was then irradiated under red LED strip (0.23 mW cm $^{-2}$ ) at room temperature. At different time intervals, the NMR spectrum was collected, which are used for the analysis and quantification of RAFT agents consumption and products formation.

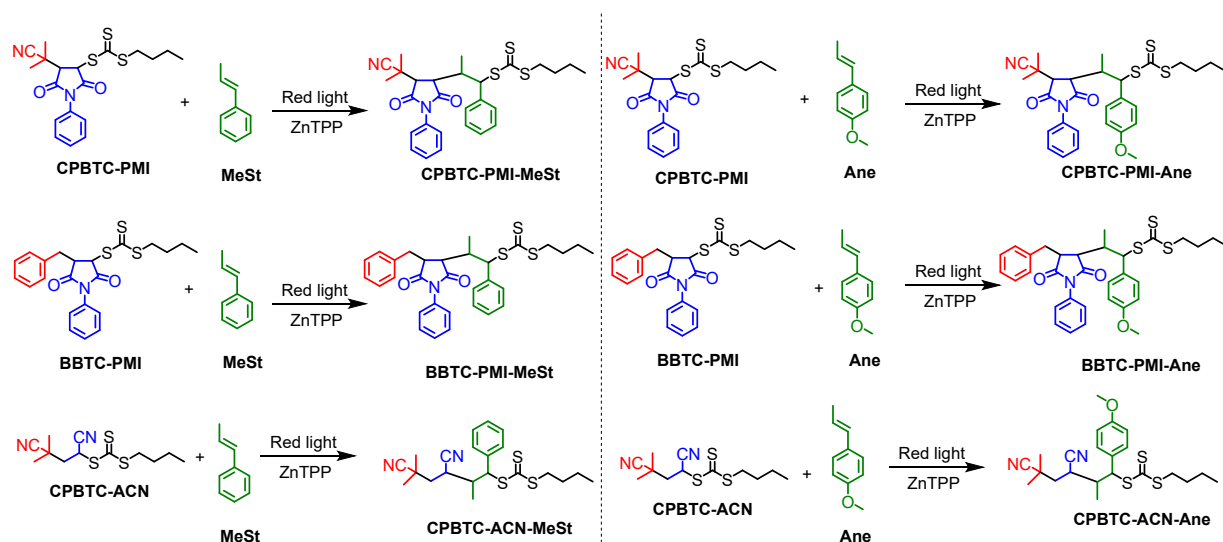

**Scheme S2.** Summary of six reactions for SUMI of MeSt or Ane into three different macro-RAFT agents for kinetic investigations.

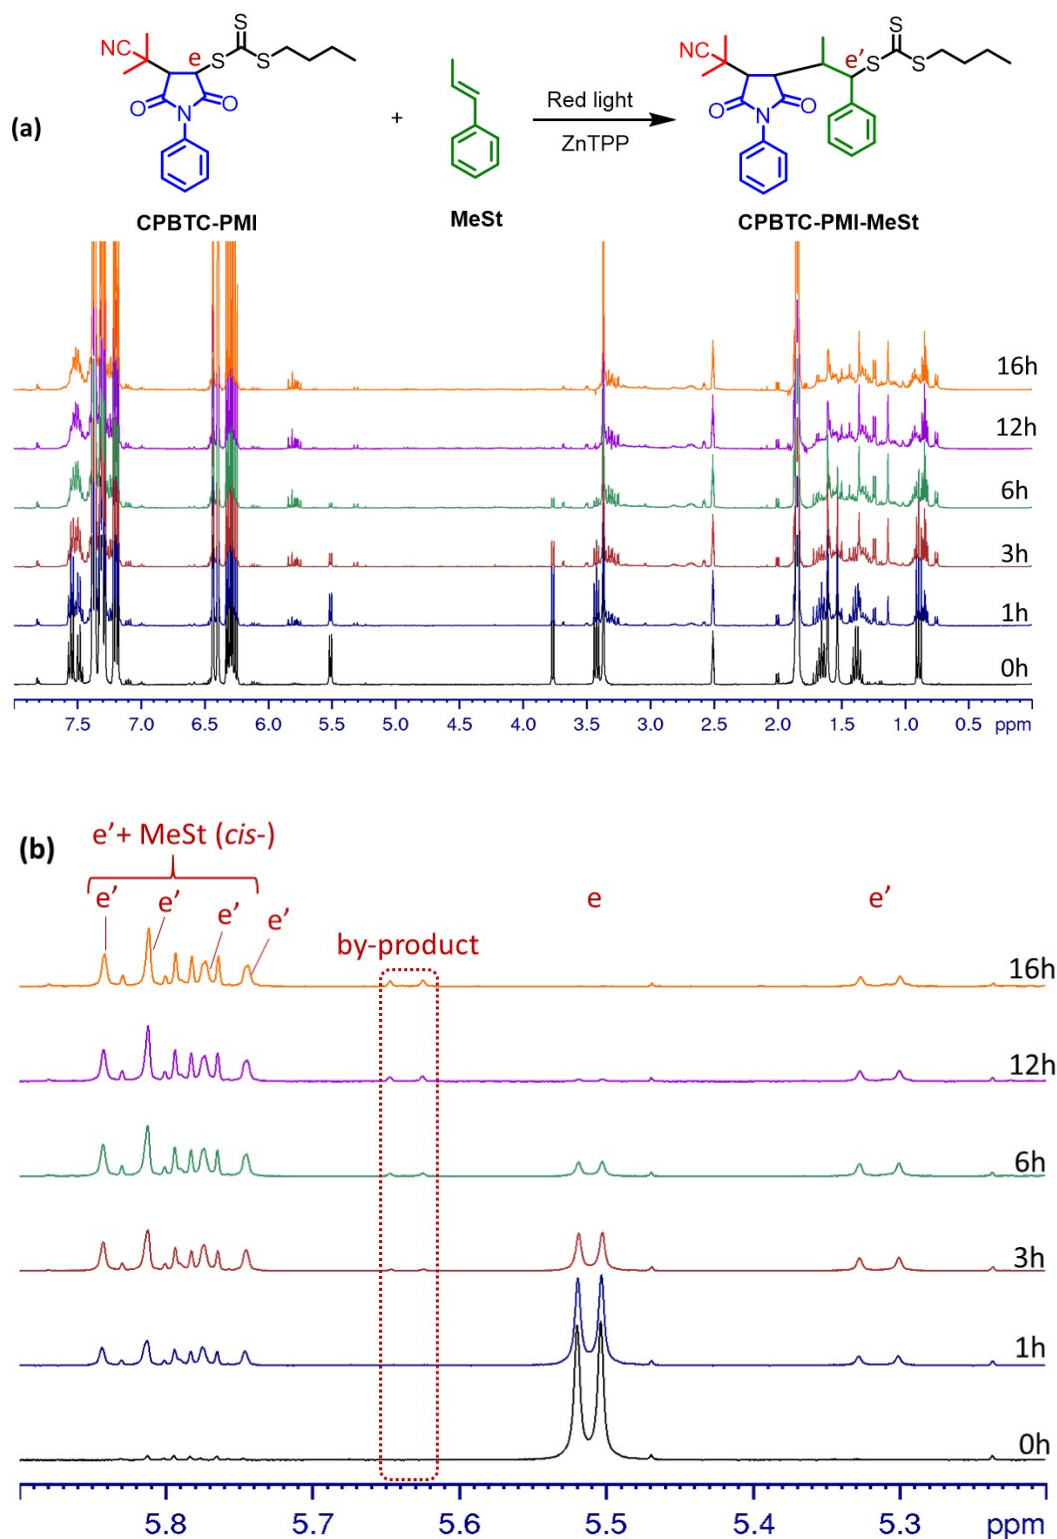

**Fig. S2** Stacked  $^1\text{H}$  NMR (DMSO- $d_6$ , 400 MHz) spectra: (a) full and (b) enlarged spectra at different irradiation time for investigating SUMI kinetics of MeSt insertion into CPBTC-PMI. *Note:* There are four doublet peaks for the proton  $e'$  in the terminal unit adjacent to thiocarbonylthio group that correspond to four diastereomers. However, two doublet peaks are overlapped at 5.85~5.80 ppm with the *cis*-isomer of MeSt (refer to **Fig. S14** for the peaks of MeSt *cis*-isomer in the area).

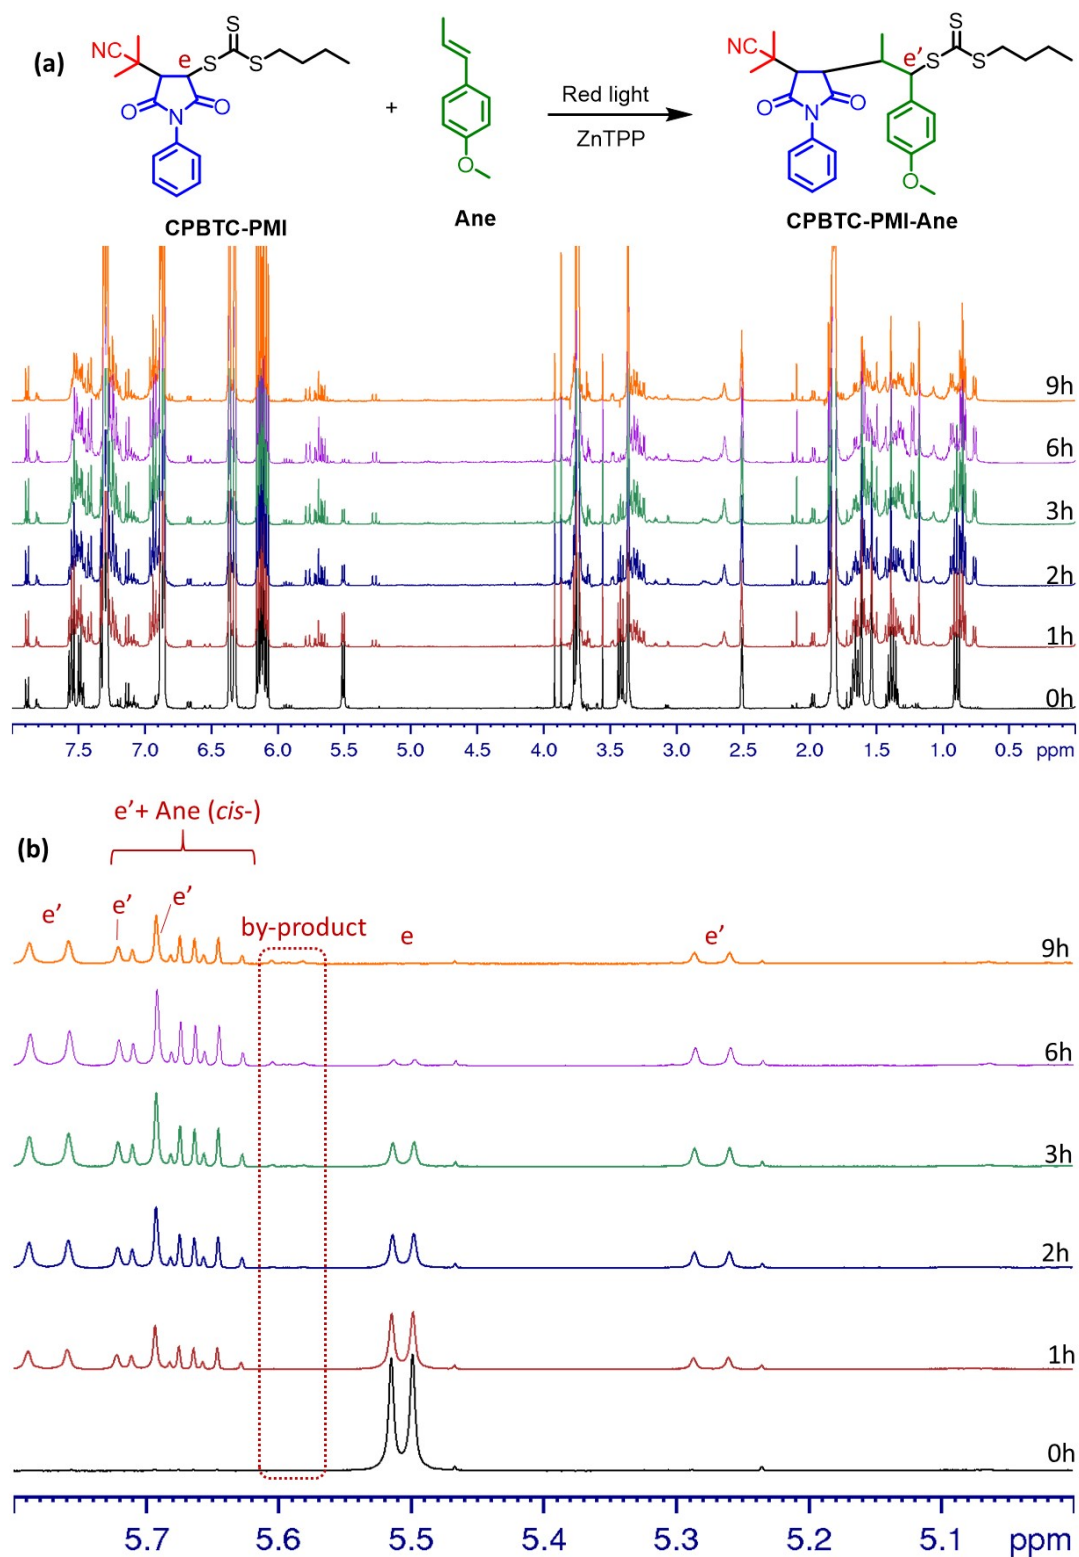

**Fig. S3** Stacked  $^1\text{H}$  NMR ( $\text{DMSO-}d_6$ , 400 MHz) spectra: (a) full and (b) enlarged spectra at different irradiation time intervals for investigating SUMI kinetics of Ane insertion into CPBTC-PMI. *Note:* There are four doublet peaks for the proton  $e'$  in the terminal unit adjacent to thiocarbonylthio group that correspond to four diastereomers. However, two doublet peaks are overlapped at 5.70 ppm with the *cis*-isomer of Ane (refer to **Fig. S15** for the peaks of Ane *cis*-isomer in the area).

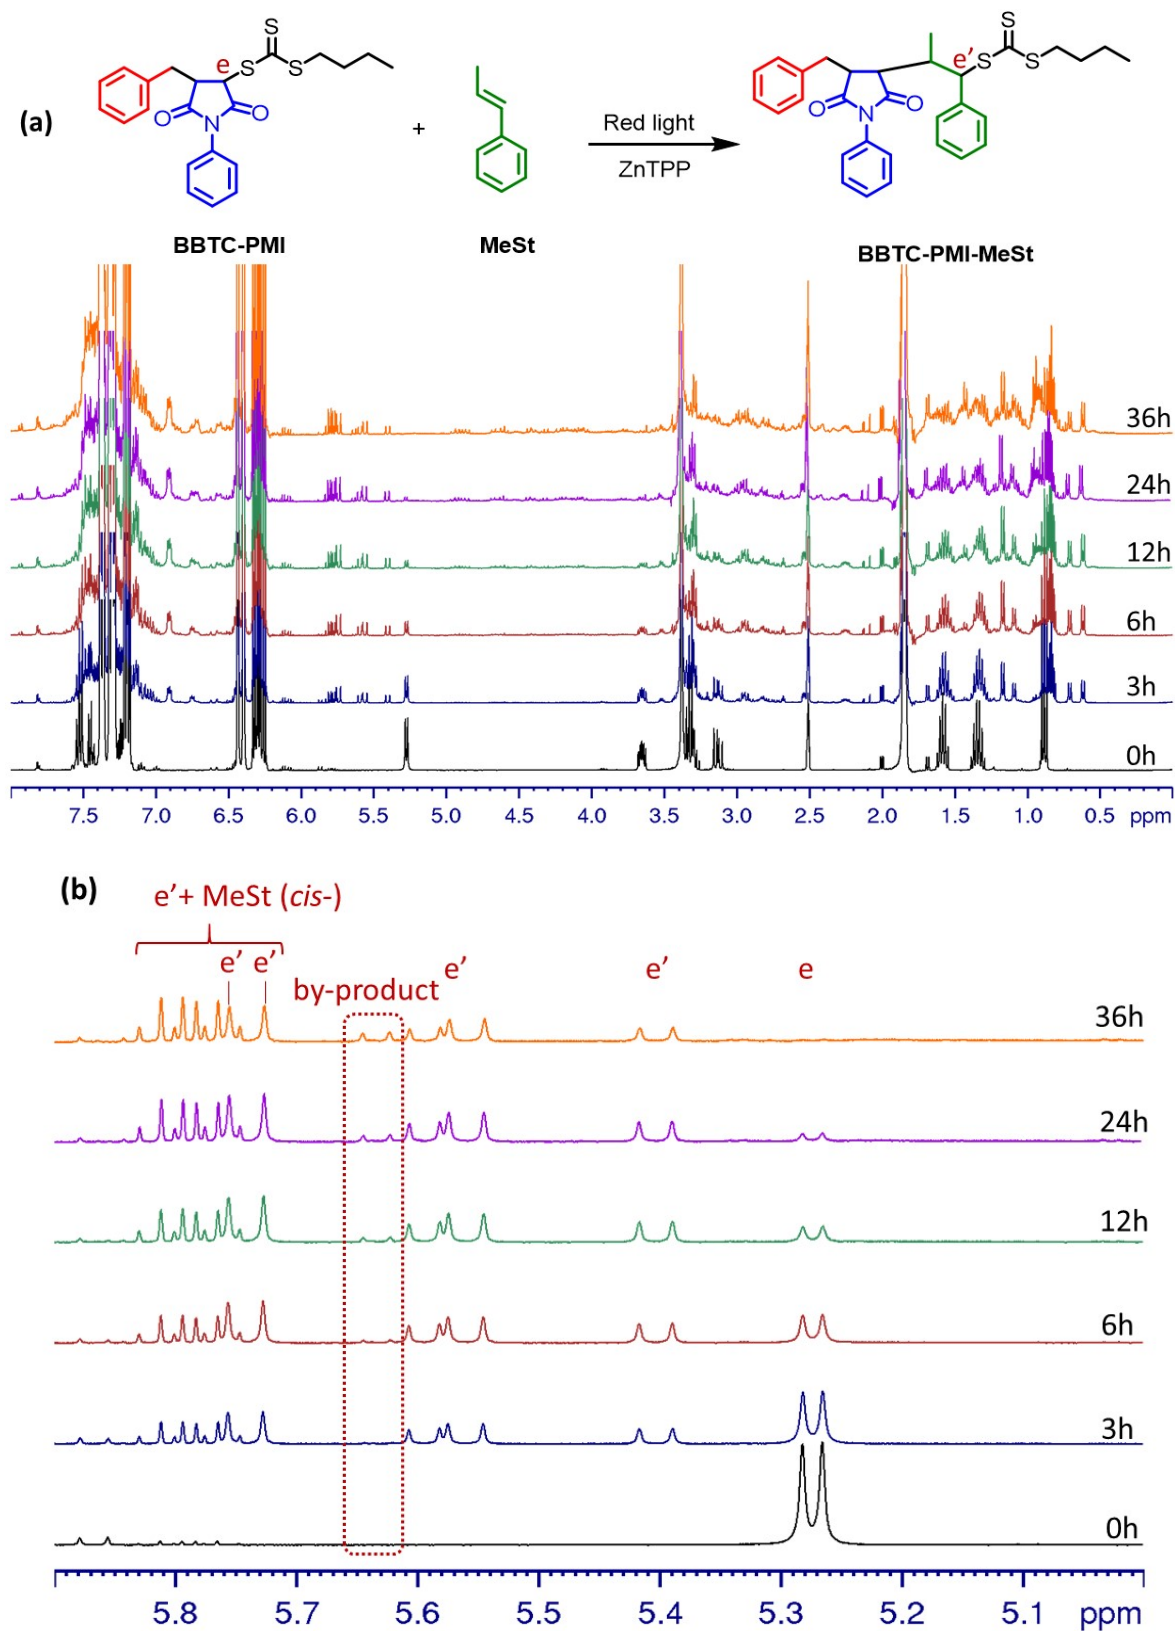

**Fig. S4**  $^1\text{H}$  NMR (DMSO- $d_6$ , 400 MHz) stacked (a) full and (b) enlarged spectra at different irradiation time intervals for investigating SUMI kinetics of MeSt insertion into BBTC-PMI.



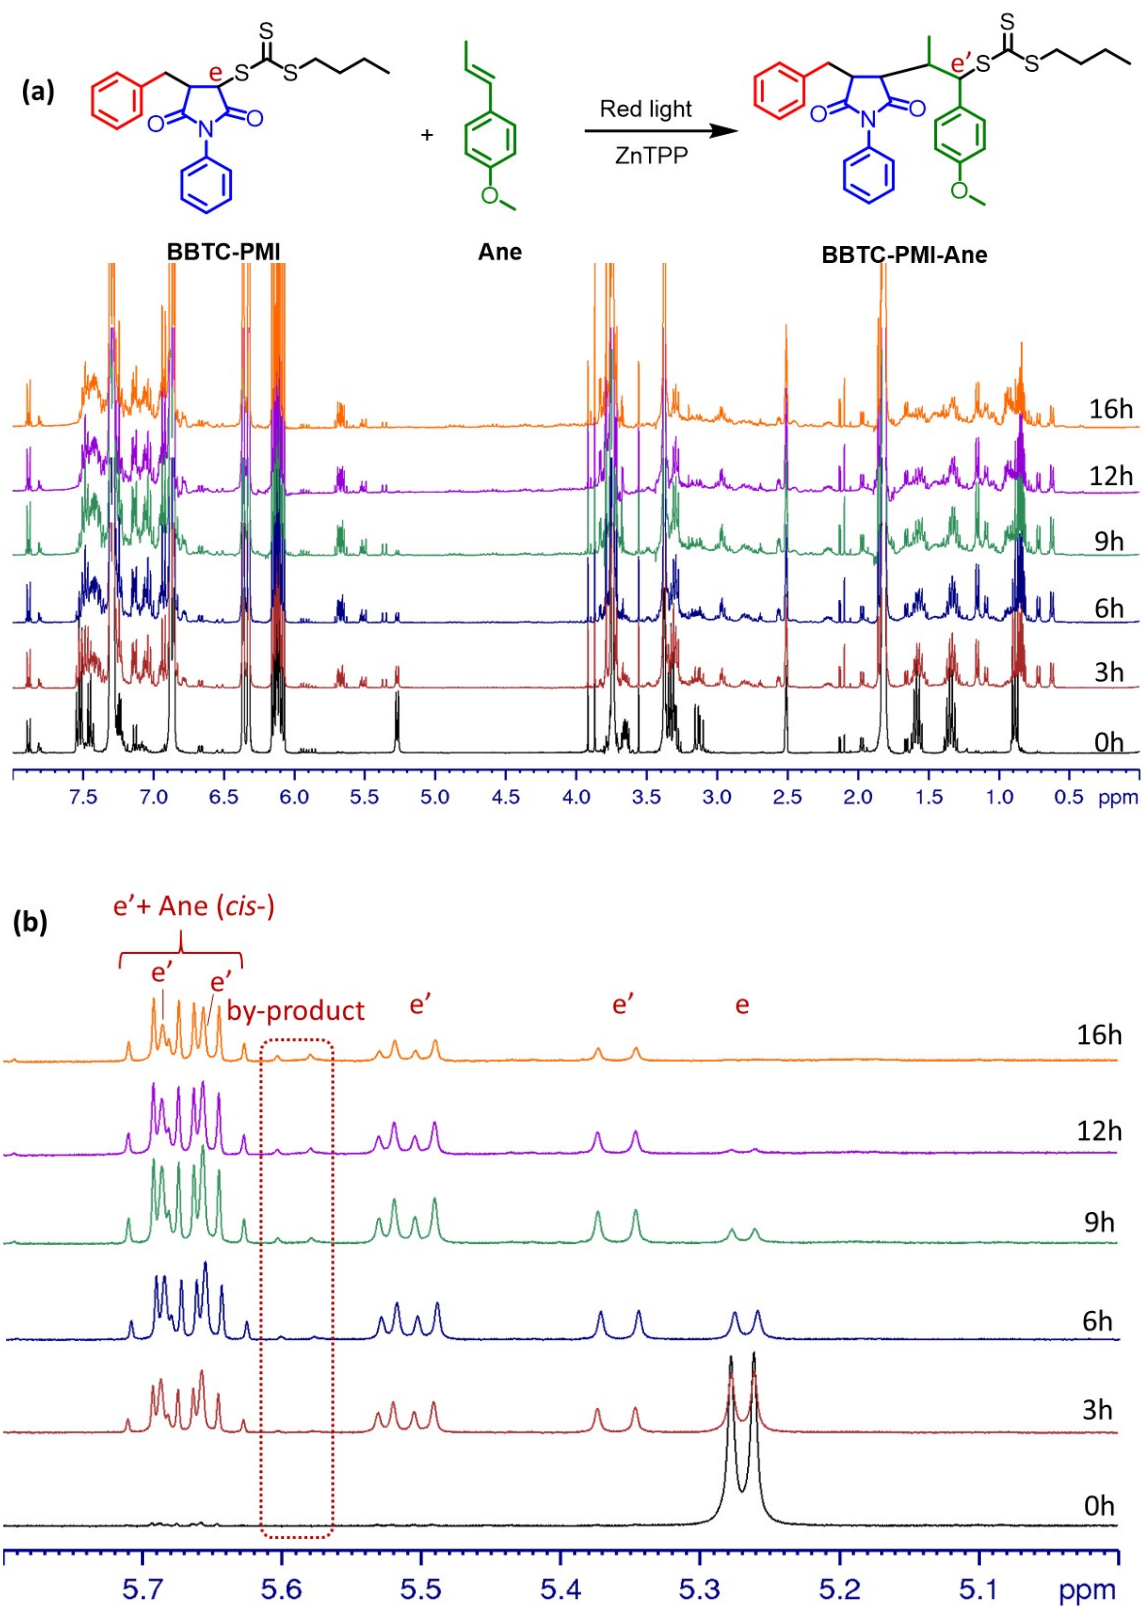

**Fig. S5**  $^1\text{H}$  NMR ( $\text{DMSO-}d_6$ , 400 MHz) stacked (a) full and (b) enlarged spectra at different irradiation time intervals for investigating SUMI kinetics of Ane insertion into BBTC-PMI.

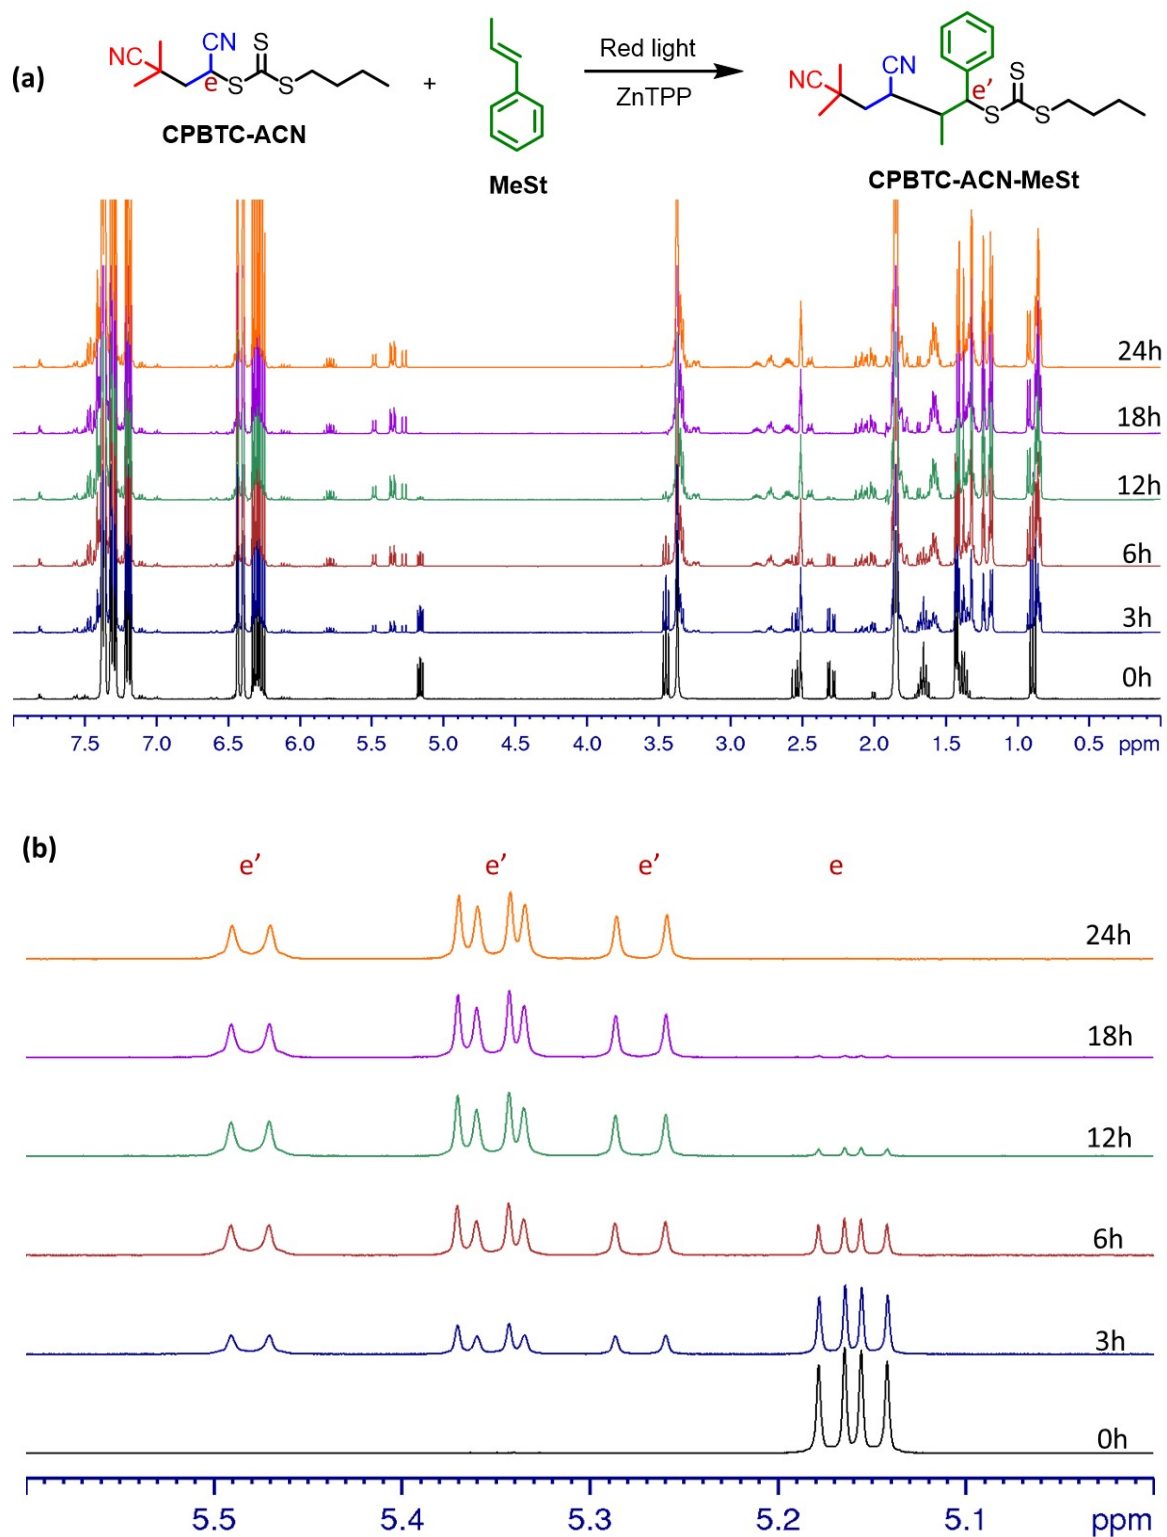

**Fig. S6**  $^1\text{H}$  NMR (DMSO- $d_6$ , 400 MHz) stacked (a) full and (b) enlarged spectra at different irradiation time intervals for investigating SUMI kinetics of MeSt insertion into CPBTC-ACN.

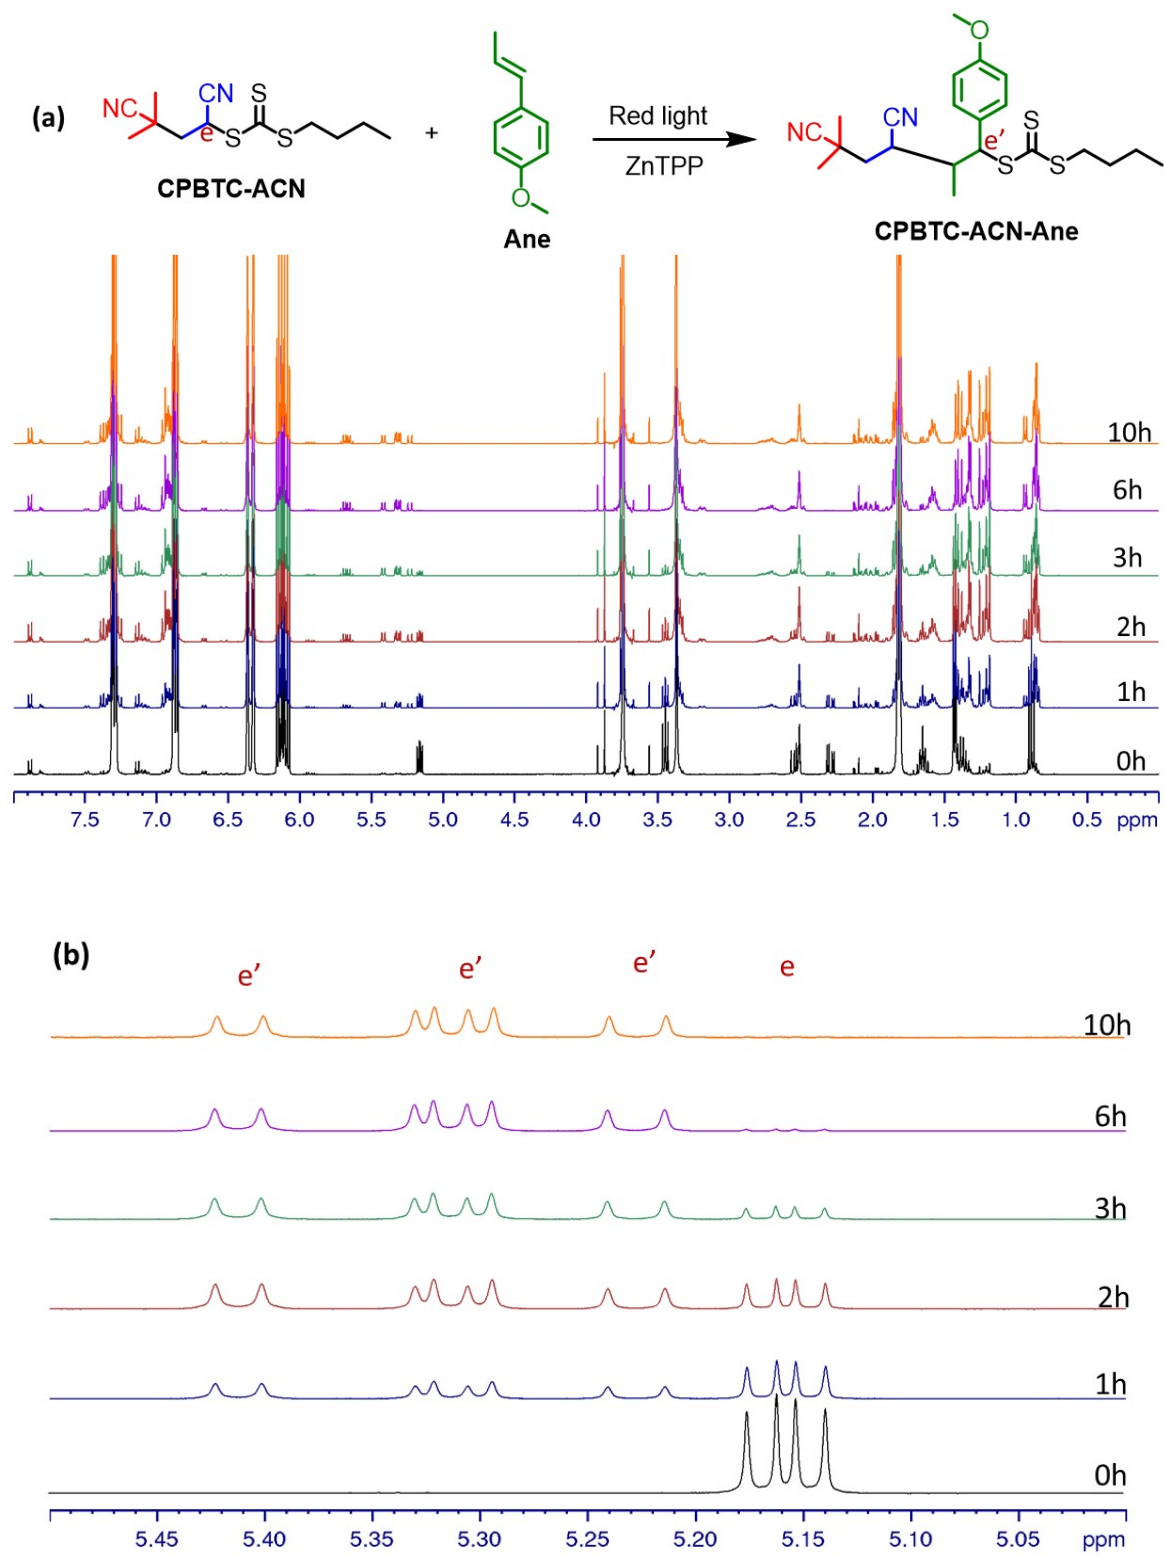

**Fig. S7**  $^1\text{H}$  NMR ( $\text{DMSO-}d_6$ , 400 MHz) stacked (a) full and (b) enlarged spectra at different irradiation time intervals for investigating SUMI kinetics of Ane insertion into CPBTC-ACN.

### 3.2. Purification of SUMI products

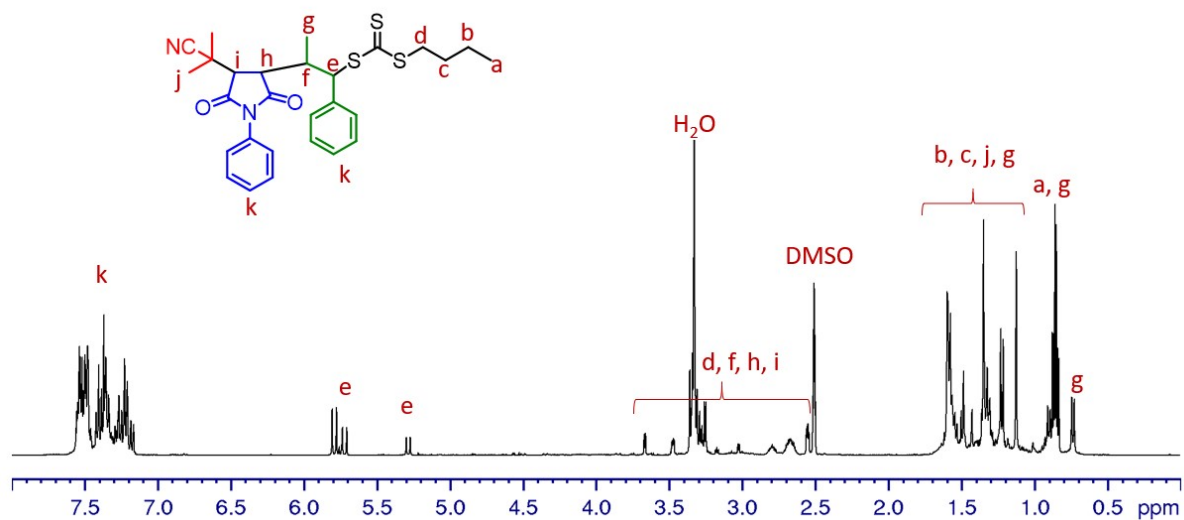

Fig. S8 <sup>1</sup>H NMR (400 MHz, DMSO-*d*<sub>6</sub>) spectrum of purified CPBTC-PMI-MeSt.

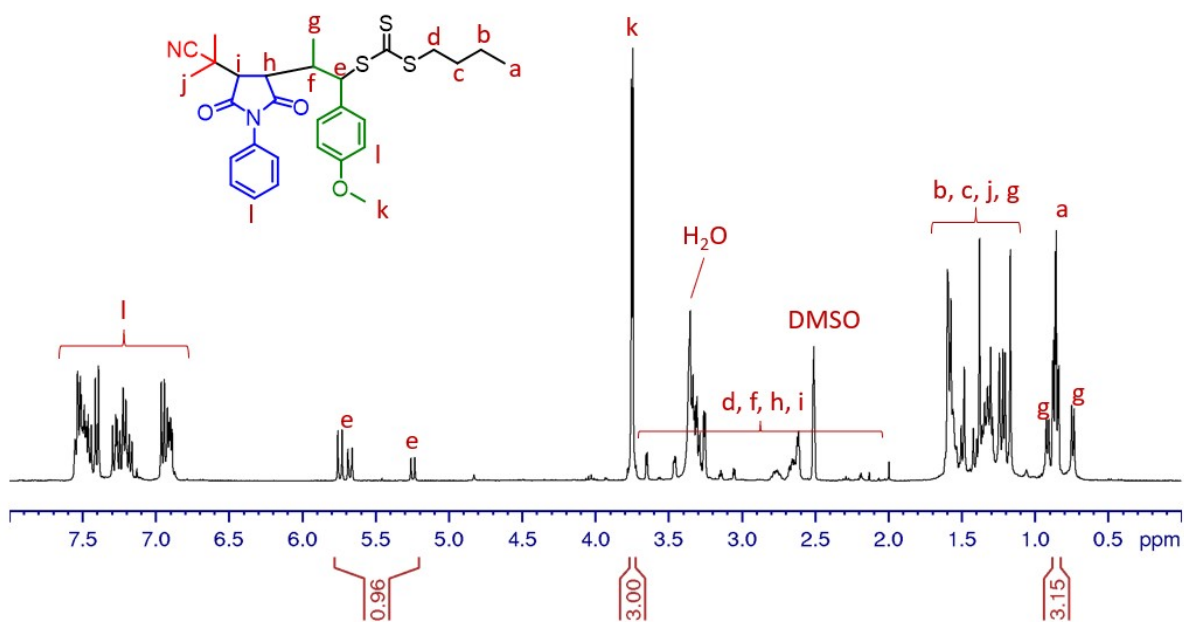

Fig. S9 <sup>1</sup>H NMR (400 MHz, DMSO-*d*<sub>6</sub>) spectrum of purified CPBTC-PMI-Ane.

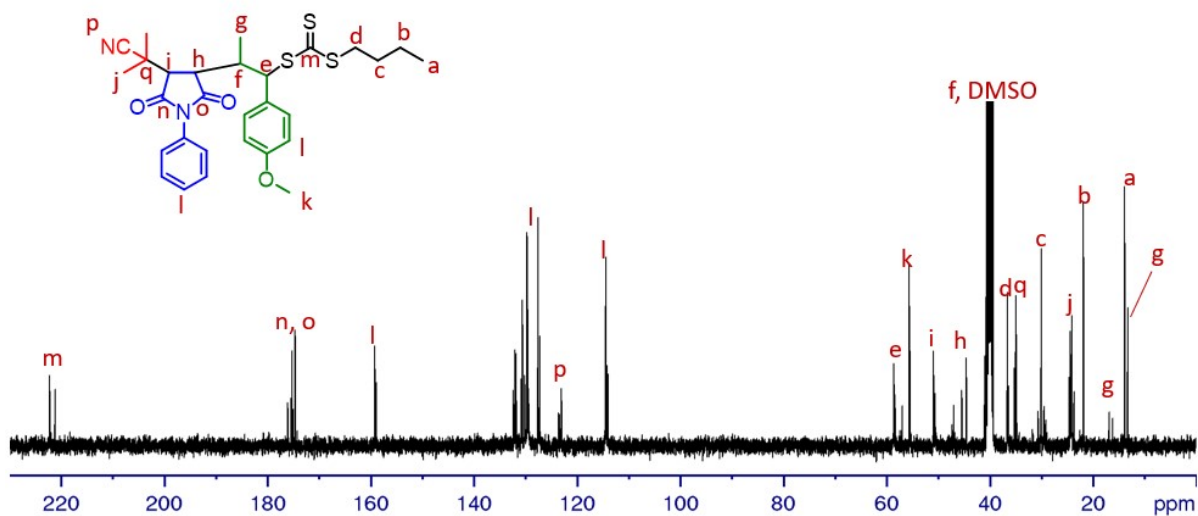

**Fig. S10**  $^{13}\text{C}$  NMR (100 MHz,  $\text{DMSO-}d_6$ ) spectrum of purified CPBTC-PMI-Ane.

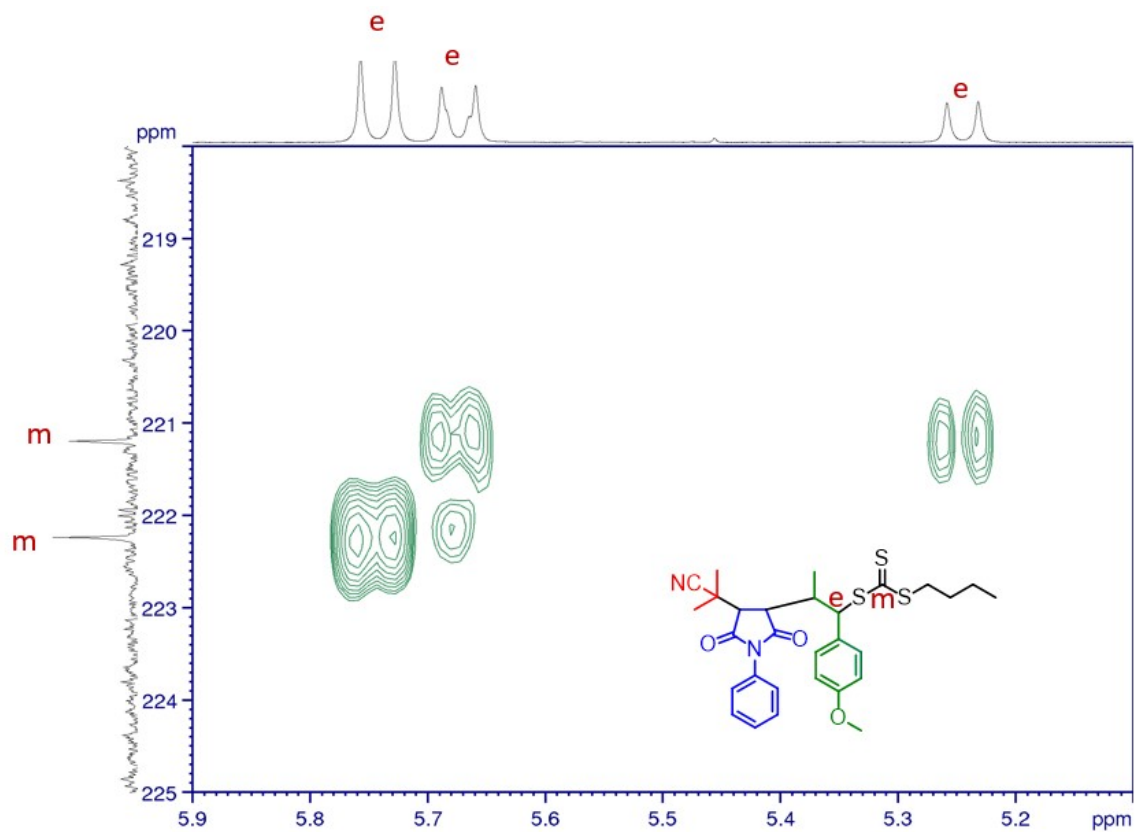

**Fig. S11** Enlarged  $^1\text{H-}^{13}\text{C}$  HMBC NMR ( $\text{DMSO-}d_6$ ) spectrum of purified CPBTC-PMI-Ane.

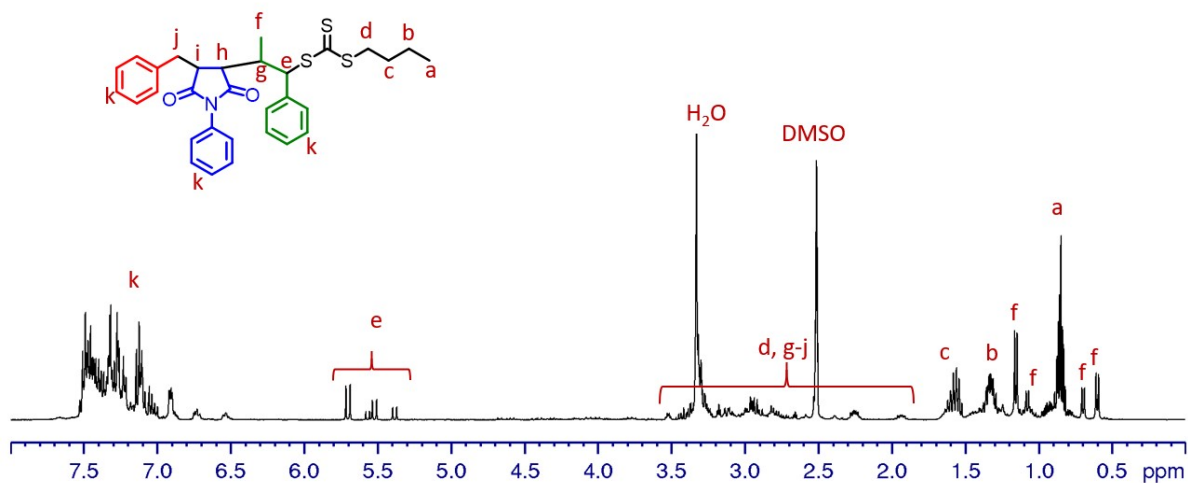

**Fig. S12** <sup>1</sup>H NMR (400 MHz, DMSO-*d*<sub>6</sub>) spectrum of purified BBTC-PMI-MeSt.

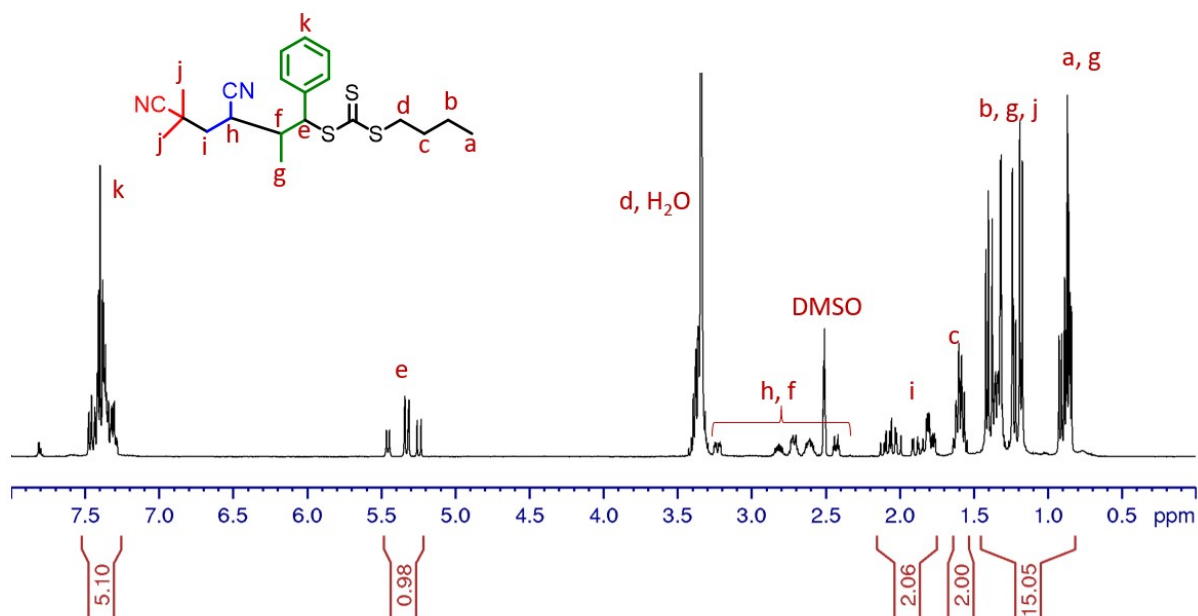

**Fig. S13** <sup>1</sup>H NMR (400 MHz, DMSO-*d*<sub>6</sub>) spectrum of purified CPBTC-ACN-MeSt.

### 3.3. Photoirradiation of MeSt and Ane

The monomers of MeSt and Ane were irradiated under red light in DMSO- $d_6$  in the presence of photocatalyst ZnTPP without any RAFT agents. NMR spectra were collected at different irradiation time to investigate the isomerization under light.

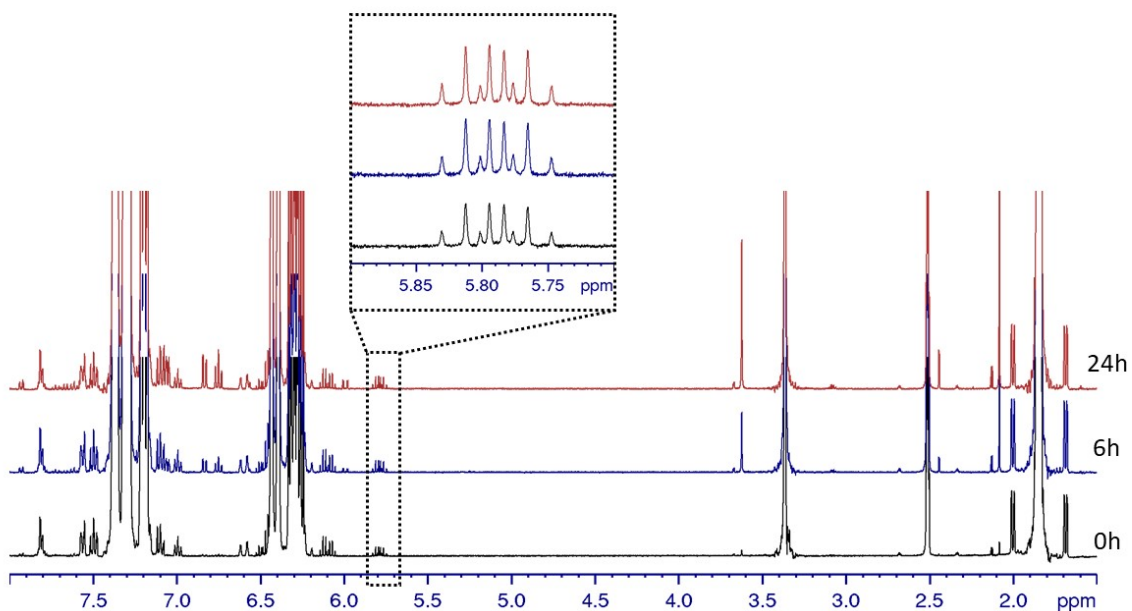

**Fig. S14** Stacked NMR spectra of MeSt at different irradiation time, indicating very slight isomerization of *trans*-isomer to *cis*-isomer.

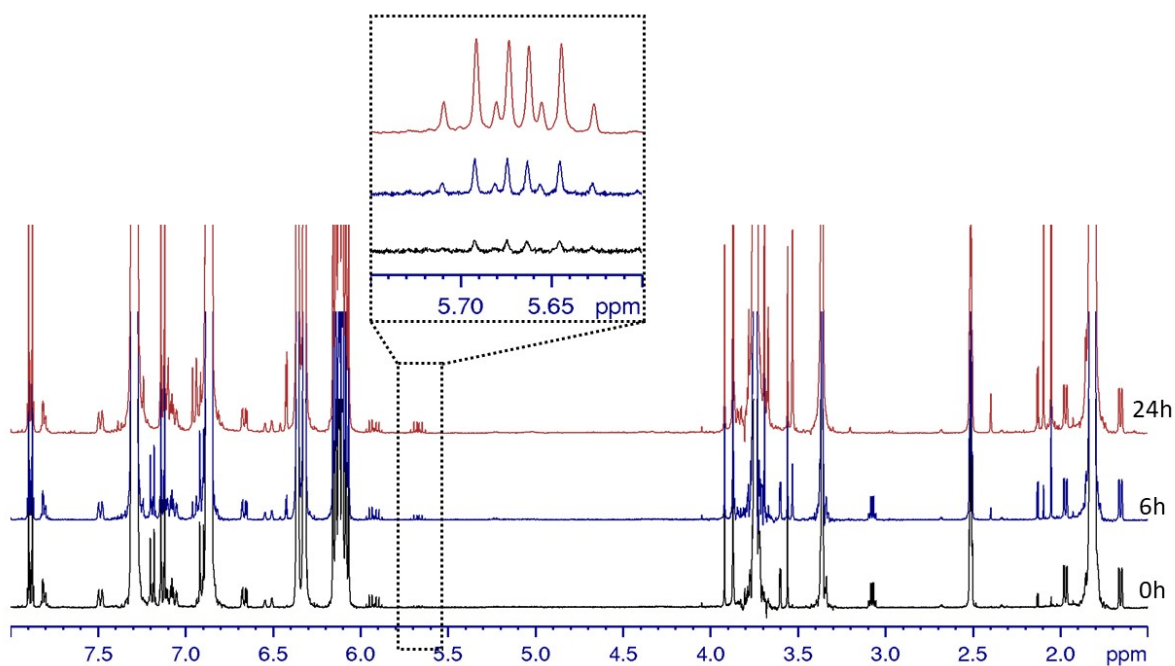

**Fig. S15** Stacked NMR spectra of Ane at different irradiation time, indicating slight isomerization of *trans*-

isomer to *cis*-isomer..



#### 4. Quantum chemical calculation

Quantum chemical calculations were carried out using Gaussian 09<sup>4</sup> software. Geometry optimization and frequency analysis of molecules and radicals were performed using density functional theory (DFT) at M06-2X<sup>5</sup>/6-31+G(d,p)<sup>6-12</sup> level using SMD solvent model<sup>13</sup> (DMSO as solvent) at 298.15K.

##### Cartesian coordinates

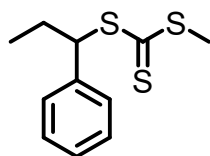

##### MeSt-SCSZ

```
C, 0, -2.1570319927, 0.827965039, -0.7029648509
C, 0, -3.4671733535, 0.3505036997, -0.7106837927
C, 0, -3.8931665152, -0.5495271353, 0.2666475712
C, 0, -3.0004599108, -0.9721591512, 1.2516725283
C, 0, -1.6892063289, -0.4976742942, 1.2566186771
C, 0, 1.7202031278, 2.9499510499, 0.3614052211
C, 0, 0.3019658173, 2.426081472, 0.168719205
C, 0, -1.2557251017, 0.4085521862, 0.2832258353
C, 0, 0.1740175817, 0.9046527471, 0.3050173336
C, 0, 4.6535077591, -1.0468407746, 1.2677404447
S, 0, 1.0497346782, 0.0396542107, -1.08914246
S, 0, 3.0132515201, -0.3062609835, 1.143612624
C, 0, 2.6247562202, -0.4973113207, -0.5456569557
S, 0, 3.6119692288, -1.196945509, -1.6734227611
H, 0, -1.8425723284, 1.5279262557, -1.4728045259
H, 0, -4.1553519115, 0.6830898148, -1.4821177062
H, 0, -3.323427653, -1.6711556552, 2.0174722106
H, 0, -0.9937737369, -0.8306103502, 2.0234145396
H, 0, 2.4100778947, 2.5291623151, -0.3791699394
H, 0, 1.7386087452, 4.0375673934, 0.2476509286
H, 0, 2.0998620433, 2.7074696153, 1.3587325278
H, 0, -0.0806196765, 2.7407296298, -0.8085492036
H, 0, -0.3601235145, 2.8652342507, 0.9248212906
H, 0, 0.6326518862, 0.5754762372, 1.241413021
H, 0, 5.3677314783, -0.5052559, 0.6462597876
H, 0, 4.9294551787, -0.9497709824, 2.3201635085
H, 0, 4.624272166, -2.1003287232, 0.9872811926
```

H, 0, -4.9143687217, -0.9184408169, 0.2603979583

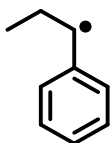

### MeSt radical

C, 0, -0.0832563719, 1.5616515839, 0.0001772901  
C, 0, 1.3009844368, 1.4937637723, -0.000148048  
C, 0, 1.9507332321, 0.2518569527, -0.000367582  
C, 0, 1.1891927998, -0.9212168384, -0.0002234195  
C, 0, -0.1992014256, -0.8654993335, 0.0001177484  
C, 0, -4.6837652323, -0.3113269601, -0.0005719918  
C, 0, -3.2097833355, -0.70970238, 0.0006839108  
C, 0, -0.877657165, 0.3824169799, 0.0002981039  
C, 0, -2.2953563818, 0.4718751472, 0.0005306554  
H, 0, -2.7379735776, 1.4660890973, 0.0006231566  
H, 0, -0.5823141162, 2.5277165032, 0.000333243  
H, 0, 1.8847600142, 2.410035539, -0.000241717  
H, 0, 1.6853203442, -1.8878286941, -0.0003879704  
H, 0, -0.7728681968, -1.7877546658, 0.0002234117  
H, 0, -5.3300605435, -1.1933757946, -0.00047197  
H, 0, -4.9263707521, 0.2864676926, 0.8840125125  
H, 0, -4.9251198987, 0.2853601219, -0.8862436825  
H, 0, -2.9966372006, -1.3448053687, -0.8725244065  
H, 0, -2.9978105829, -1.343682007, 0.8750087767  
H, 0, 3.0352538831, 0.2004178621, -0.0006433312

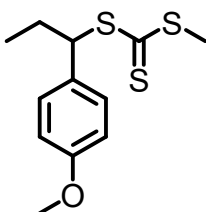

### Ane-SCSZ

C, 0, -0.1079197934, -4.3818857199, 2.9896632992  
O, 0, 1.0612450712, -3.6576108088, 2.6299019321  
C, 0, -0.0998409105, -0.1808873252, 3.0118626234  
C, 0, -0.1444330155, -1.5779248564, 3.0135143998  
C, 0, 0.9953371357, -2.3031771648, 2.6570163257  
C, 0, 2.1676847363, -1.6223419969, 2.2988758811  
C, 0, 2.1922802416, -0.2362182449, 2.3002794743  
C, 0, 0.5944751879, 4.2023507646, 3.8798182714

C, 0, 0.3844128461, 2.6948529003, 3.802019741  
C, 0, 1.0606172379, 0.5093211749, 2.6620422357  
C, 0, 1.1200899565, 2.0198534507, 2.6402325655  
C, 0, 3.4985261824, 5.5826392228, 0.0949628545  
S, 0, 0.3866483342, 2.5508644329, 1.0126861839  
S, 0, 2.8608949664, 4.2292101384, 1.1027166227  
C, 0, 1.3279293474, 3.8712631284, 0.3515467008  
S, 0, 0.7276936889, 4.6365980288, -0.9864441887  
H, 0, -0.9390168408, -4.1513597147, 2.3143366721  
H, 0, 0.151602125, -5.4363274887, 2.8977571239  
H, 0, -0.4012501954, -4.1680270683, 4.0233257963  
H, 0, -0.9974038114, 0.3630051664, 3.2933840586  
H, 0, -1.0637548237, -2.0783877259, 3.2940643601  
H, 0, 3.0473397126, -2.1973526633, 2.0261606415  
H, 0, 3.106238991, 0.282381543, 2.0188647652  
H, 0, 0.2391403959, 4.7084455843, 2.9747553618  
H, 0, 0.040784765, 4.616487755, 4.7271653444  
H, 0, 1.6526075038, 4.4471694941, 4.013919555  
H, 0, -0.686535673, 2.4736040725, 3.735101083  
H, 0, 0.7495246886, 2.2235587874, 4.7228097519  
H, 0, 2.1723866942, 2.3171340873, 2.6417284438  
H, 0, 2.830025307, 6.4433199484, 0.1416041954  
H, 0, 4.463337352, 5.8377470907, 0.538986114  
H, 0, 3.6370800162, 5.2623837771, -0.9382235794

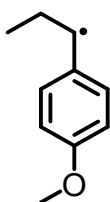

### Ane radical

C, 0, 0.2394646594, -3.8581368145, 0.9908957083  
O, 0, 0.7252236015, -2.7215782367, 1.6917280973  
C, 0, 0.8112344827, 0.8835156359, 1.4039453628  
C, 0, 0.9936116398, -0.3994724532, 1.873810591  
C, 0, 0.4962807113, -1.4993380067, 1.148703795  
C, 0, -0.1856005218, -1.2820993698, -0.054199712  
C, 0, -0.366832233, 0.0159910061, -0.5239329981  
C, 0, -0.7987858051, 4.3365896836, -1.7917549696  
C, 0, -0.7618145025, 2.8302139465, -1.5446682233  
C, 0, 0.1222744764, 1.1430193893, 0.1837803068  
C, 0, -0.0526113747, 2.4718304972, -0.2783934886  
H, 0, 0.3560093774, 3.2768563801, 0.3294594502

H, 0, 0.524767651, -4.7240810374, 1.5880462524  
H, 0, -0.8512764785, -3.826533436, 0.8934489365  
H, 0, 0.6949617152, -3.9349345983, -0.0024989187  
H, 0, 1.2006475035, 1.7233205416, 1.9743054871  
H, 0, 1.5205986225, -0.5838422798, 2.8054376471  
H, 0, -0.5772839111, -2.1131417622, -0.6295217026  
H, 0, -0.8992541605, 0.1586997836, -1.459925604  
H, 0, -1.3227047919, 4.5703746747, -2.7228626349  
H, 0, -1.3141368943, 4.853907511, -0.9758118195  
H, 0, 0.2143081807, 4.7458939456, -1.8629711013  
H, 0, -0.2801702266, 2.3282397223, -2.398008269  
H, 0, -1.7891117216, 2.4348052772, -1.5227121929

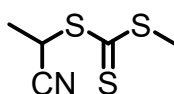

### ACN-SCSZ

C, 0, -2.6387695724, -1.1546119093, 1.9343733842  
C, 0, -1.2630629472, -0.4801431115, 1.9605190397  
C, 0, 2.9059117728, 1.816641161, -0.9718181175  
S, 0, -0.5614375795, -0.5420735809, 0.2733960158  
S, 0, 1.626666731, 0.5633592668, -1.186048078  
C, 0, 0.8004030548, 0.5823384105, 0.3556738318  
S, 0, 1.2117435325, 1.492562846, 1.6569306599  
C, 0, -0.3629276464, -1.1478664543, 2.9076677825  
N, 0, 0.3180805557, -1.7035894218, 3.6593176395  
H, 0, -2.5687228015, -2.1959008103, 1.6116688947  
H, 0, -3.0657013567, -1.1252561819, 2.9391118049  
H, 0, -3.2976192726, -0.607473231, 1.2572869819  
H, 0, -1.3502425291, 0.5692645325, 2.2549417694  
H, 0, 2.4586863346, 2.7895213529, -0.7633056224  
H, 0, 3.5938006483, 1.5311587293, -0.1748720527  
H, 0, 3.4374298056, 1.849420032, -1.9253703537

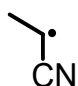

### ACN radical

C, 0, 1.1511539661, 0.523954181, -0.0979282556  
C, 0, -0.206601562, 0.4602471077, 0.5078479825  
C, 0, -1.160247081, -0.4802021029, 0.1133363072  
N, 0, -1.9559139161, -1.2695415874, -0.2196618724

H, 0, 1. 30736011, 1. 5050021496, -0. 5623955191  
H, 0, 1. 3016600781, -0. 2520564128, -0. 8493869633  
H, 0, -0. 4974369121, 1. 1592448373, 1. 2843584228  
H, 0, 1. 914036247, 0. 4195250475, 0. 6824804079

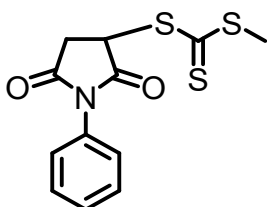

**PMI-SCSZ**

C, 0, 2. 7664968474, -0. 423118952, 3. 3054403809  
C, 0, 3. 679607979, 0. 5033982392, 3. 8053968894  
C, 0, 4. 750860941, 0. 9268316144, 3. 0177453914  
C, 0, 4. 9088919651, 0. 4285936605, 1. 7238365395  
C, 0, 3. 9950533115, -0. 4901426912, 1. 2105137896  
C, 0, 2. 933630529, -0. 9084994811, 2. 0100760931  
O, 0, 0. 1074914631, -0. 5310524895, 1. 5629139694  
O, 0, 3. 4452855706, -3. 6410114069, 1. 2681255245  
C, 0, 2. 3315135935, -3. 1793397189, 1. 1827416795  
N, 0, 1. 9983679814, -1. 8577909089, 1. 49313269  
C, 0, 0. 6507418991, -1. 5748195485, 1. 2919471632  
C, 0, 1. 0682723268, -3. 9065057549, 0. 7733108413  
C, 0, 0. 0180270701, -2. 8025878867, 0. 6430345094  
C, 0, -5. 3958893455, -1. 4378002311, 0. 3331242125  
S, 0, -1. 5647396979, -3. 2371800017, 1. 4056680549  
S, 0, -4. 2267042282, -2. 2491033865, 1. 4418113085  
C, 0, -2. 7368394281, -2. 2395331553, 0. 5277407849  
S, 0, -2. 4956477043, -1. 4840831689, -0. 90644478  
H, 0, 1. 9332750265, -0. 7699254822, 3. 9089075904  
H, 0, 3. 5556756295, 0. 8895101601, 4. 8122591878  
H, 0, 5. 4627988406, 1. 6454175982, 3. 4119989537  
H, 0, 5. 7412455634, 0. 7579159457, 1. 1098364471  
H, 0, 4. 0985324135, -0. 8792480506, 0. 2022527049  
H, 0, 1. 2294342158, -4. 4559250927, -0. 1548793393  
H, 0, 0. 8403061174, -4. 6279410936, 1. 5654307016  
H, 0, -0. 1746347937, -2. 5561702648, -0. 4060656558  
H, 0, -6. 3502362257, -1. 4479271516, 0. 8641087151  
H, 0, -5. 0912812439, -0. 408240963, 0. 1420817381  
H, 0, -5. 486829627, -1. 9915006475, -0. 6027240755

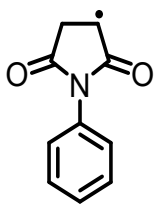

### PMI radical \

C, 0, -1.0053426392, 1.5928041816, 0.9903627536  
 C, 0, -0.388035019, 2.7435709973, 1.4771090662  
 C, 0, 0.9859699387, 2.7546011186, 1.7204673774  
 C, 0, 1.7476293194, 1.6125531536, 1.4698614017  
 C, 0, 1.1421485116, 0.4612295655, 0.9698410609  
 C, 0, -0.2330767004, 0.459241641, 0.7371412666  
 O, 0, -1.8601893132, 0.2275899111, -1.6497495403  
 O, 0, -0.1714907376, -2.204328651, 1.8653727609  
 C, 0, -0.7719640003, -1.9669237942, 0.8394042788  
 N, 0, -0.857397667, -0.7166258285, 0.2331507833  
 C, 0, -1.6455417654, -0.7458411233, -0.9447484641  
 C, 0, -1.566683798, -2.9465588137, -0.0064021493  
 C, 0, -2.0932186005, -2.1104444589, -1.1087396687  
 H, 0, -2.0746967153, 1.5688277707, 0.806652045  
 H, 0, -0.9841093803, 3.6298208221, 1.6714236587  
 H, 0, 1.4622926815, 3.6515721267, 2.10436158  
 H, 0, 2.8170055615, 1.617486483, 1.6567091958  
 H, 0, 1.7256021389, -0.4295438801, 0.7600048272  
 H, 0, -0.9097463394, -3.753987325, -0.352992077  
 H, 0, -2.353354453, -3.4083714267, 0.6027229238  
 H, 0, -2.7095010231, -2.4356724698, -1.9347530804

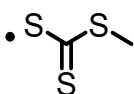

C, 0, 1.7989883536, 0.3643806985, -0.0001248566  
 S, 0, -2.5513601423, 0.9662490935, -0.0003680571  
 S, 0, 0.3938555028, 1.5051980741, -0.0002924236  
 C, 0, -0.9500573467, 0.4391979906, -0.0002033772  
 S, 0, -0.9367689963, -1.2395034847, 0.0000755407  
 H, 0, 2.6866895633, 1.0001653905, -0.0002006752  
 H, 0, 1.7951173846, -0.2511743774, 0.900635006  
 H, 0, 1.795135681, -0.2514133851, -0.9007211569

## References

1. Huang, Z.; Noble, B. B.; Corrigan, N.; Chu, Y.; Satoh, K.; Thomas, D. S.; Hawker, C. J.; Moad, G.; Kamigaito, M.; Coote, M. L.; Boyer, C.; Xu, J., Discrete and Stereospecific Oligomers Prepared by Sequential and Alternating Single Unit Monomer Insertion. *J. Am. Chem. Soc.* **2018**, *140* (41), 13392-13406.
2. Haridharan, N.; Bhandary, R.; Ponnusamy, K.; Dhamodharan, R., Synthesis of Fluorescent, Dansyl End-Functionalized PMMA and Poly(methyl methacrylate-*b*-phenanthren-1-yl-methacrylate) Diblock Copolymers, at Ambient Temperature. *J. Polym. Sci. A, Polym. Chem.* **2012**, *50* (8), 1491-1502.
3. Zhang, L.; Liu, R.; Huang, Z.; Xu, J., How does the single unit monomer insertion technique promote kinetic analysis of activation and initiation in photo-RAFT processes? *Polym. Chem.* **2021**, *12* (4), 581-593.
4. Frisch, M. J.; Trucks, G. W.; Schlegel, H. B.; Scuseria, G. E.; Robb, M. A.; Cheeseman, J. R.; Scalmani, G.; Barone, V.; Petersson, G. A.; Nakatsuji, H.; Li, X.; Caricato, M.; Marenich, A. V.; Bloino, J.; Janesko, B. G.; Gomperts, R.; Mennucci, B.; Hratchian, H. P.; Ortiz, J. V.; Izmaylov, A. F.; Sonnenberg, J. L.; Williams; Ding, F.; Lipparini, F.; Egidi, F.; Goings, J.; Peng, B.; Petrone, A.; Henderson, T.; Ranasinghe, D.; Zakrzewski, V. G.; Gao, J.; Rega, N.; Zheng, G.; Liang, W.; Hada, M.; Ehara, M.; Toyota, K.; Fukuda, R.; Hasegawa, J.; Ishida, M.; Nakajima, T.; Honda, Y.; Kitao, O.; Nakai, H.; Vreven, T.; Throssell, K.; Montgomery Jr., J. A.; Peralta, J. E.; Ogliaro, F.; Bearpark, M. J.; Heyd, J. J.; Brothers, E. N.; Kudin, K. N.; Staroverov, V. N.; Keith, T. A.; Kobayashi, R.; Normand, J.; Raghavachari, K.; Rendell, A. P.; Burant, J. C.; Iyengar, S. S.; Tomasi, J.; Cossi, M.; Millam, J. M.; Klene, M.; Adamo, C.; Cammi, R.; Ochterski, J. W.; Martin, R. L.; Morokuma, K.; Farkas, O.; Foresman, J. B.; Fox, D. J. *Gaussian 09 Rev. D.01*, Wallingford, CT, 2013.
5. Zhao, Y.; Truhlar, D. G., The M06 suite of density functionals for main group thermochemistry, thermochemical kinetics, noncovalent interactions, excited states, and transition elements: two new functionals and systematic testing of four M06-class functionals and 12 other functionals. *Theor. Chem. Acc.* **2008**, *120* (1-3), 215-241.
6. Ditchfield, R.; Hehre, W. J.; Pople, J. A., Self-consistent molecular-orbital methods. IX. An extended Gaussian-type basis for molecular-orbital studies of organic molecules. *J. Chem. Phys.* **1971**, *54* (2), 724-728.
7. Hehre, W. J.; Ditchfield, R.; Pople, J. A., Self-consistent molecular orbital methods. XII. Further extensions of Gaussian-type basis sets for use in molecular orbital studies of organic molecules. *J. Chem. Phys.* **1972**, *56* (5), 2257-2261.
8. Hariharan, P. C.; Pople, J. A., The influence of polarization functions on molecular orbital hydrogenation energies. *Theor. Chim. Acta* **1973**, *28* (3), 213-222.
9. Gordon, M. S.; Binkley, J. S.; Pople, J. A.; Pietro, W. J.; Hehre, W., Self-consistent molecular-orbital methods. 22. Small split-valence basis sets for second-row elements. *J. Am. Chem. Soc.* **1982**, *104* (10), 2797-2803.
10. Francl, M. M.; Pietro, W. J.; Hehre, W. J.; Binkley, J. S.; Gordon, M. S.; DeFrees, D. J.; Pople, J. A., Self-consistent molecular orbital methods. XXIII. A polarization-type basis set for second-row elements. *J. Chem. Phys.* **1982**, *77* (7), 3654-3665.
11. Clark, T.; Chandrasekhar, J.; Spitznagel, G. W.; Schleyer, P. V. R., Efficient diffuse function-augmented basis sets for anion calculations. III. The 3-21+ G basis set for first-row elements, Li-F. *J. Comput. Chem.* **1983**, *4* (3), 294-301.
12. Spitznagel, G. W.; Clark, T.; von Ragué Schleyer, P.; Hehre, W., An evaluation of the performance of diffuse function-augmented basis sets for second row elements, Na-Cl. *J. Comput. Chem.* **1987**, *8* (8), 1109-1116.
13. Marenich, A. V.; Cramer, C. J.; Truhlar, D. G., Universal solvation model based on solute electron density and on a continuum model of the solvent defined by the bulk dielectric constant and atomic surface tensions. *J. Chem. Phys. B* **2009**, *113* (18), 6378-6396.
